# Supplementary material for: An efficient blue–violet phosphor: an advanced material designed for high-quality full-spectrum lighting
Source: Royal Society of Chemistry journal article supplement (doi:10.1039/d3dt04096h), 2024-01-01
Supplement: d3dt04096h1.pdf [file d3dt04096h1.pdf]

## Efficient Blue-Violet Phosphor: An Advanced Material Designed for High-Quality Full-Spectrum Lighting

Xiudi Wu,<sup>a, b</sup> Yonghui Xu,<sup>a, b</sup> Shuwen Yin,<sup>a</sup> Chuansheng Zhong,<sup>a, b</sup> Xibao Zhang,<sup>a, b</sup> Liang

Zhou,<sup>a, b\*</sup> and Hongpeng You<sup>a, b c\*</sup>

<sup>a</sup> State Key Laboratory of Rare Earth Resource Utilization, Changchun Institute of Applied Chemistry, Chinese Academy of Sciences, Changchun 130022, P. R. China

<sup>b</sup> University of Science and Technology of China, Hefei 230026, P. R. China

<sup>c</sup> Ganjiang Innovation Academy, Chinese Academy of Sciences, Ganzhou 341000,

China

\*Corresponding author. Fax: +86 431 85698041. E-mail address: [zhoul@ciac.ac.cn](mailto:zhoul@ciac.ac.cn) (L. Zhou), [hpyou@ciac.ac.cn](mailto:hpyou@ciac.ac.cn) (H.P. You).

**Table S1:** Refined crystallographic parameters for samples BSBCl:0.03Ce<sup>3+</sup>.

| Compound            | BSBCl:0.03Ce <sup>3+</sup> |
|---------------------|----------------------------|
| Space group         | <i>Pnma</i>                |
| Symmetry            | orthorhombic               |
| a / Å               | 6.9295                     |
| b / Å               | 16.4428                    |
| c / Å               | 9.5153                     |
| V/Å <sup>3</sup>    | 1084.1835                  |
| A = β = γ           | 90°                        |
| Z                   | 4                          |
| R <sub>wp</sub> , % | 12.32                      |
| R <sub>p</sub> , %  | 9.46                       |
| χ <sup>2</sup>      | 3.22                       |

**Table S2:** Main refinement parameters and crystallographic data of BSBCl:0.03Ce<sup>3+</sup>.

|     | x       | y       | z       | Occ.  | U     | Site | Sym. |
|-----|---------|---------|---------|-------|-------|------|------|
| Ba1 | 0.36377 | 0.41068 | 0.11185 | 0.655 | 0.009 | 8d   | 1    |
| Ce3 | 0.36377 | 0.41068 | 0.11185 | 0.03  | 0.128 | 8d   | 1    |
| Sr1 | 0.36377 | 0.41068 | 0.11185 | 0.315 | 0.027 | 8d   | 1    |
| Ce2 | 0.495   | 0.40106 | 0.72084 | 0.03  | 0.156 | 8d   | 1    |
| Sr2 | 0.495   | 0.40106 | 0.72084 | 0.97  | 0.011 | 8d   | 1    |
| Ce1 | 0.473   | 0.25    | 0.4655  | 0.03  | 0.018 | 4c   | m    |
| Sr3 | 0.473   | 0.25    | 0.4655  | 0.97  | 0.011 | 4c   | m    |
| Cl1 | 0.1103  | 0.25    | 0.3297  | 1     | 0.01  | 4c   | m    |
| O1  | 0.4168  | 0.25    | 0.7079  | 1     | 0.001 | 4c   | m    |
| O2  | 0.2646  | 0.1787  | 0.8883  | 1     | 0.159 | 8d   | 1    |
| O3  | 0.7087  | 0.4328  | 0.9272  | 1     | 0.011 | 8d   | 1    |
| O4  | 0.2764  | 0.503   | 0.8352  | 1     | 0.037 | 8d   | 1    |
| O5  | 0.9858  | 0.1072  | 0.0875  | 1     | 0.017 | 8d   | 1    |
| B1  | 0.8     | 0.4395  | 0.0582  | 1     | 0.243 | 8d   | 1    |
| B2  | 0.31    | 0.25    | 0.838   | 1     | 0.112 | 4c   | m    |

**Table S3:** Chromaticity parameters of WLED devices at 20–100 mA operating current.

| <i>Type</i>    | <b>Current (mA)</b> | <b>CIE coordinates</b> | <b>CCT (K)</b> | <b>CRI</b>  |
|----------------|---------------------|------------------------|----------------|-------------|
| <i>pc-WLED</i> | <b>20</b>           | <b>0.3436, 0.3539</b>  | <b>4755 K</b>  | <b>97.2</b> |
|                | <b>40</b>           | <b>0.3388, 0.3480</b>  | <b>4918 K</b>  | <b>95.5</b> |
|                | <b>60</b>           | <b>0.3364, 0.3446</b>  | <b>5001 K</b>  | <b>94.4</b> |
|                | <b>80</b>           | <b>0.3354, 0.3424</b>  | <b>5070 K</b>  | <b>93.6</b> |
|                | <b>100</b>          | <b>0.3345, 0.3408</b>  | <b>5105 K</b>  | <b>93.1</b> |

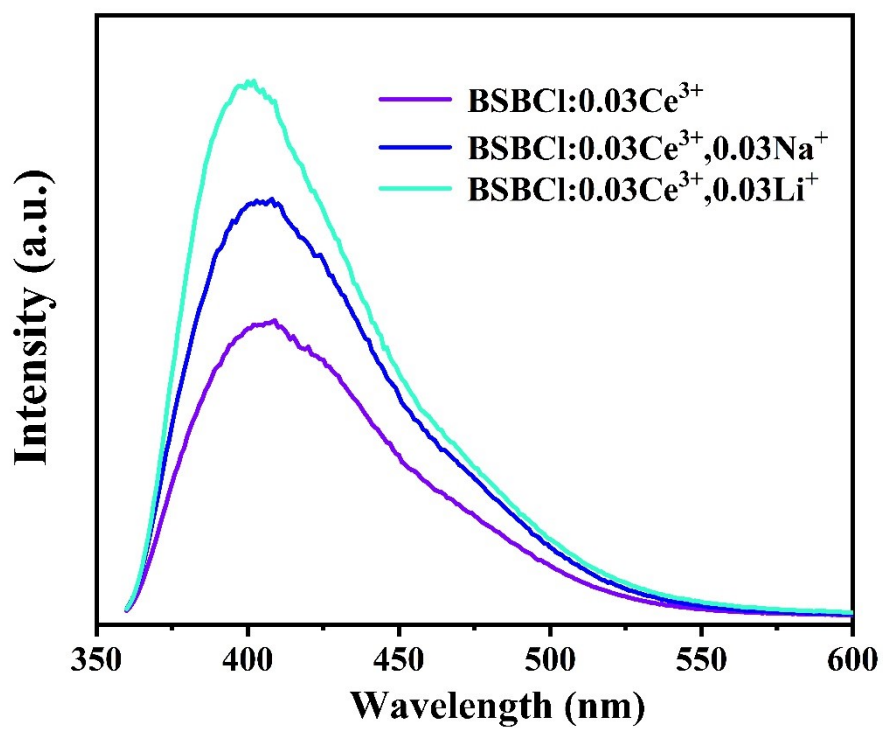

**Fig. S1** PL emission spectra of BSBCl:0.03Ce<sup>3+</sup> and BSBCl:0.03Ce<sup>3+</sup>,0.03M<sup>+</sup> (M<sup>+</sup>=Li<sup>+</sup> and Na<sup>+</sup>) excited at 330 nm.
